# Supplementary material
Source: MDPI journal article supplement (https://www.mdpi.com/2311-7524/10/5/495)
Supplement: s1 [file s1]

Supplementary table S1. Absorbance for ELISA test for GLRaV-3 on 'Tribidrag' plants used in the experiments. Absorbance is presented as mean values of two technical replicates.

| Treatment | Repetition | Absorbance<br>405 nm |
|-----------|------------|----------------------|
| TRII      | A          | 2.9812               |
| TRII      | B          | 0.5134               |
| TRII      | C          | 2.4126               |
| TRII      | D          | 1.0391               |
| TRII      | E          | 3.0546               |
| TRII      | F          | 0.6312               |
| TRX       | A          | 0.8135               |
| TRX       | B          | 1.2156               |
| TRX       | C          | 1.9722               |
| TRX       | D          | 1.2346               |
| TRX       | E          | 0.7831               |
| TRY       | A          | 0.8123               |
| TRY       | B          | 0.8935               |
| TRY       | C          | 0.9932               |
| TRY       | D          | 0.5321               |
| TRY       | E          | 1.0814               |
| TRQ       | A          | 3.3261               |
| TRQ       | B          | 3.3371               |
| TRQ       | C          | 2.7382               |
| TRQ       | D          | 1.8863               |
| TRQ       | E          | 1.0621               |
| TRZ       | A          | 1.0871               |
| TRZ       | B          | 1.3325               |
| TRZ       | C          | 0.8772               |
| TRZ       | D          | 0.9612               |
| TRZ       | E          | 2.6612               |

Supplementary figure S1. Results of multiplex PCR obtained from samples of 'Tribidrag' plants infected with inoculum Z. For internal control, 18s genomic region of *Vitis* was used (844 bp). Products of grapevine leafroll-associated virus 3 (GLRaV-3) and grapevine virus A (GVA) are represented on the figure with their respective lengths: GLRaV-3 – 336 bp and GVA – 272 bp.

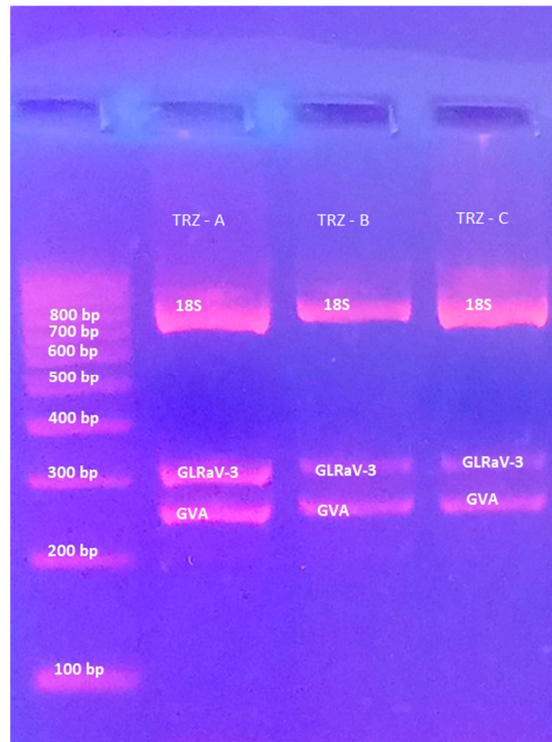

Supplementary figure S2. Heat map analysis calculated from measured parameters in 'Tribidrag' plants infected with GLRaV-3 singly or in coinfection with other viruses (Table 1.) in the second year of measurements, control plants are marked with C on the x axis. Distance was determined by Euclidean method (columns) and clustering (rows) was performed using Ward method [38]. Abbreviations are as following: c – concentration, Cu – Copper, Ca – calcium, Zn – zinc, Mn – manganese, P – phosphorus, Fe – iron, K<sub>2</sub>O – Potassium, Mg – Magnesium, Car – Carotenoids, PhiCO<sub>2</sub> – Quantum yield from CO<sub>2</sub> assimilation, DW leaves – dried weight of leaves, Photo (A) – assimilation rate, Trmmol – leaf transpiration, Cl *a* and *b* – Chlorophyll *a* and *b*, RWC – relative water content, Perm. Memb – Membrane permeability, Cond (gs) – stomatal conductance.

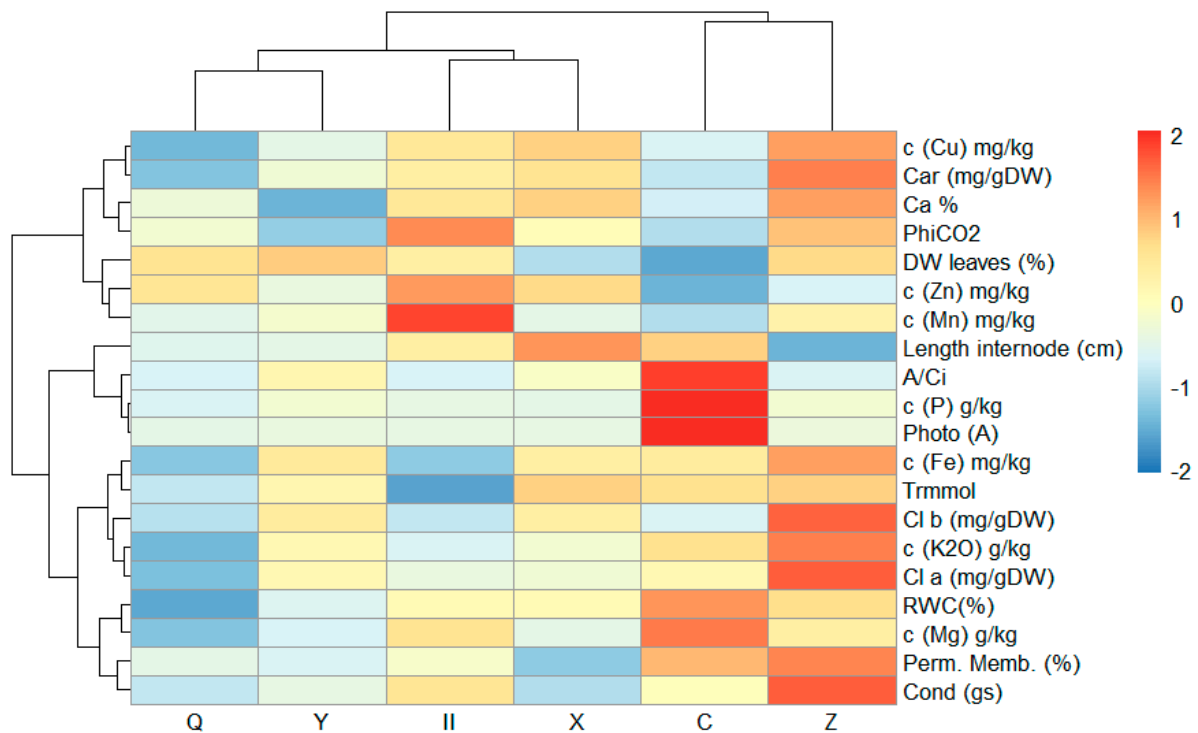

Supplementary figure S3. Results of ANOVA test and post hoc Tukey comparing the changes in measured parameters between control and infected plants in the first year of measurements. Significant changes are marked amongst boxplots representing individual treatments as listed in Table 1. Outlier measurements that are 1.5 times over the upper/lower quartile of the dataset of an individual boxplot are marked with points. Abbreviations for individual parameters are as following: c – concentration, P – phosphorus, K2O – potassium, Mg – magnesium, Ca – calcium, Zn – zinc, Mn – manganese, Cu – copper, Car – total carotenoid content, Photo (A) – assimilation rate, Cond (gs) – stomatal conductance, PhiCO<sub>2</sub> – Quantum yield from CO<sub>2</sub> assimilation.

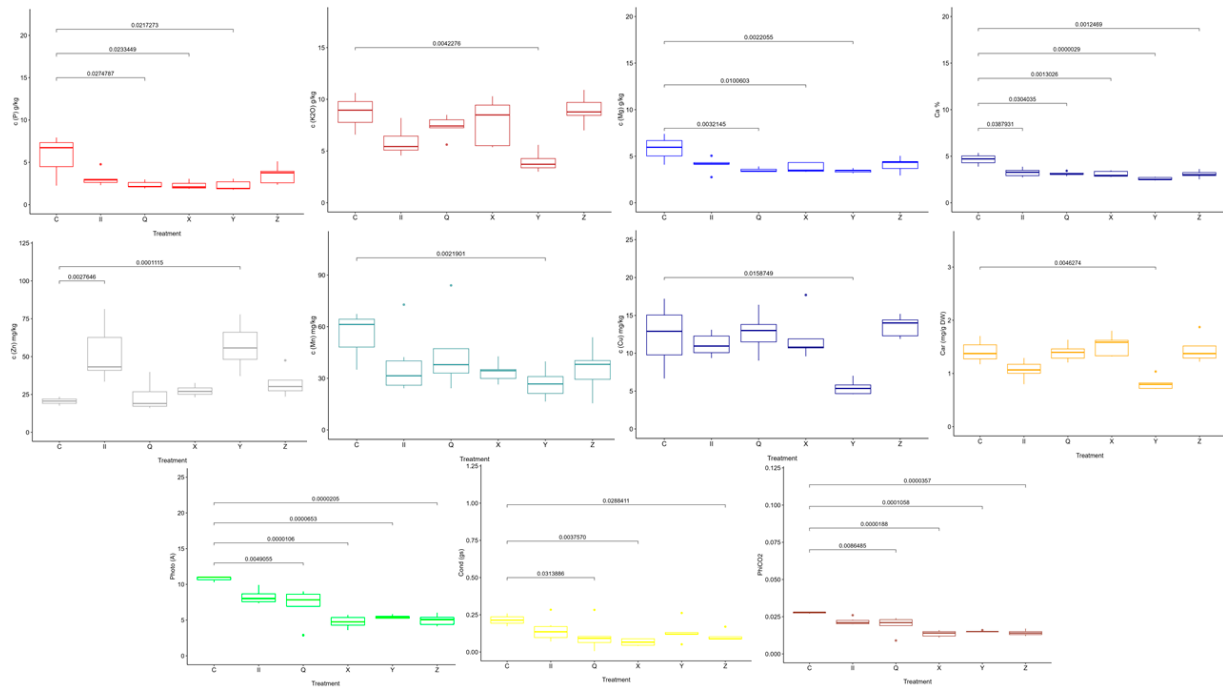

Supplementary figure S4. Results of ANOVA test and post hoc Tukey comparing changes in measured parameters in the infected with the control plants in the second year of measurements. Significant changes are marked amongst boxplots representing individual treatments as listed in Table 1. Outlier measurements that are 1.5 times over the upper/lower quartile of the dataset of an individual boxplot are marked with points. Abbreviations for individual parameters are: c – concentration, P – phosphorus, Photo (A) – assimilation rate, Ci – Substomal CO<sub>2</sub> concentration, Trmmol – Leaf transpiration.

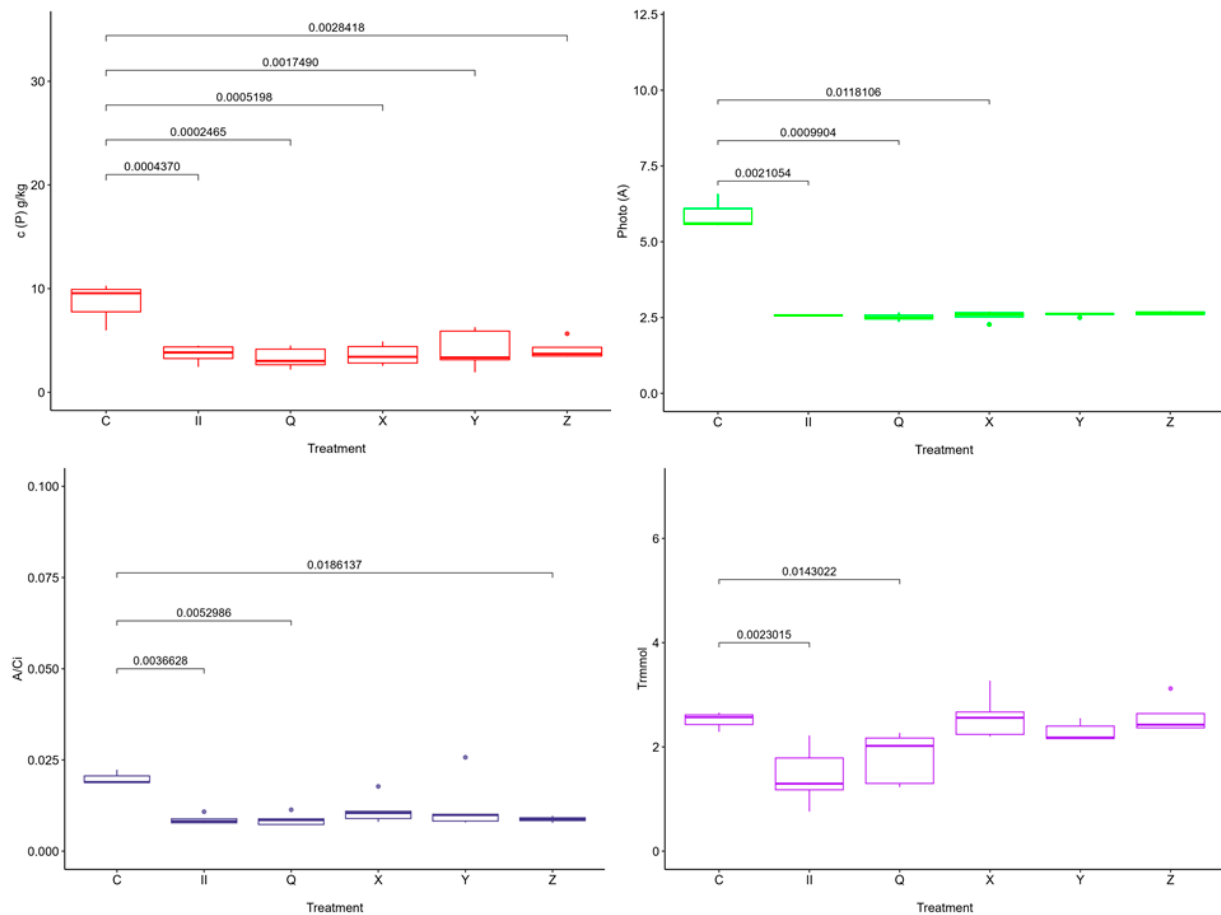

**Supplementary table S2.** List of abbreviations: physiological and morphological parameters as indicators of ‘Tribidrag’ response to viral infection.

| <b>Abbreviation</b> | <b>Parameter name</b>                           |
|---------------------|-------------------------------------------------|
| <b>P</b>            | Phosphorus                                      |
| <b>K</b>            | Potassium                                       |
| <b>N</b>            | Nitrogen                                        |
| <b>Ca</b>           | Calcium                                         |
| <b>Zn</b>           | Zinc                                            |
| <b>Mn</b>           | Manganese                                       |
| <b>Fe</b>           | Iron                                            |
| <b>Mg</b>           | Magnesium                                       |
| <b>Cu</b>           | Copper                                          |
| <b>Cl <i>a</i></b>  | Chlorophyll a                                   |
| <b>Cl <i>b</i></b>  | Chlorophyll b                                   |
| <b>Car</b>          | Carotenoids                                     |
| <b>proline</b>      | Proline                                         |
| <b>len_inter</b>    | Length internode                                |
| <b>DW_leaves</b>    | Dried weight of leaves                          |
| <b>Photo (A)</b>    | Assimilation rate                               |
| <b>Cond (gs)</b>    | Stomatal conductance                            |
| <b>Ci</b>           | Substomal CO <sub>2</sub> concentration         |
| <b>A/Ci</b>         | A/Ci                                            |
| <b>A/gs</b>         | A/gs                                            |
| <b>PhiCO2</b>       | Quantum yield from CO <sub>2</sub> assimilation |
| <b>TrmoIE</b>       | Leaf transpiration                              |
| <b>RWC</b>          | Relative water content                          |
| <b>perm_memb</b>    | Membrane permeability                           |
