# Supplementary material
Source: MDPI journal article supplement (https://www.mdpi.com/2311-7524/10/5/495)
Supplement: s1 [file s1]

Archive with 3 entries (3 files):
- Supplementary figure 1.pdf
- Supplementary table 3. -  Tribidrag.xlsx
- Supplementary table 4. - qPCR raw data.xlsx
