# Supplementary material
Source: MDPI journal article supplement (https://www.mdpi.com/2311-7524/10/5/495)
Supplement: s1 [file s1 › Supplementary table 3. - Tribidrag.xlsx]

## Sheet: First year
Treatment	GLD symptom expression	Proline (µg/g DW)	DW leaves (%)	Perm. Memb. (%)	RWC (%)	Length internode (cm)	c (P) g/kg	c (K2O) g/kg	c (Mg) g/kg	Ca %	c (Zn) mg/kg	c (Mn) mg/kg	c (Cu) mg/kg	c (Fe) mg/kg	Cl a (mg/gDW)	Cl b (mg/gDW)	Car (mg/gDW)	Photo (A)	Cond (gs)	Ci	A/Ci	W(A/gs)	PhiCO2	Trmmol
C	C	278.629	23.4462	0.150816	90.449	8.1993	6.73	10.62	5.96	4.71	20.6	67.4	17.2	107	4.46341	1.82179	1.37376	10.3	0.214	307	0.0335505	48.1308	0.027	3.72
C	C	334.297	25.736	0.115101	89.9901	6.73333	2.25	6.59	4.09	3.88	23.4	35	6.66	122	4.91056	0.870056	1.17337	11	0.173	282	0.0390071	63.5838	0.028	2.87
C	C	287.079	28.6643	0.124747	93.2008	5.49545	7.93	8.95	7.4	5.35	17.6	61.3	12.9	111	2.996	2.08855	1.70306	11	0.259	315	0.0349206	42.471	0.028	4.02
X	N	657.664	22.5417	0.129432	84.3621	6.925	3.05	10.29	4.34	3.48	25.1	34.4	17.7	167	3.98245	1.58638	1.33191	3.6	0.0412	248	0.0145161	87.3786	0.011	0.864
X	N	531.042	24.1632	0.131961	86.7385	8.12667	1.86	5.52	4.32	3.37	23.1	42.7	9.59	113	4.35172	1.68903	1.58719	4.75	0.0455	220	0.0215909	104.396	0.014	0.954
X	N	421.425	24.1963	0.116826	93.3631	9.8	1.96	5.37	3.49	2.78	32.5	35.1	11.9	153	6.1048	2.68015	1.80155	4.29	0.0658	282	0.0152128	65.1976	0.012	1.33
X	N	396.072	20.3369	0.146329	84.3421	5.24615	2.52	9.44	3.33	2.93	29.3	26.4	10.7	124	4.64375	1.5918	1.62173	5.36	0.0885	289	0.0185467	60.565	0.015	1.76
X	N	241.615	25	0.129996	85.2332	7.50667	2.09	8.49	3.38	2.85	27	29.9	10.8	172	3.99634	1.33988	1.31985	5.72	0.0901	284	0.0201408	63.485	0.016	1.8
Y	Y	425.044	29.8813	0.148104	87.4359	4.81299	3.06	3.72	3.17	2.51	66.1	26.7	5.81	62.8	2.84358	1.60243	0.79663	5.4	0.12	313	0.0172524	45	0.015	2.27
Y	Y	630.165	31.8786	0.160985	89.2067	6.63125	2.7	3.38	3.46	2.4	37.2	39.8	4.67	72.1	2.80152	1.07327	1.0357	5.52	0.12	312	0.0176923	46	0.015	2.26
Y	Y	304.161	28.5062	0.0784859	86.0991	4.78333	1.91	3.01	3.29	2.46	55.7	16.5	5.35	57.6	2.3163	0.898835	0.823684	5.84	0.0515	205	0.0284878	113.398	0.016	1.07
Y	Y	318.844	27.9348	0.0771267	86.7991	5.72952	1.75	5.59	3.73	2.71	77.8	21.2	4.61	68.5	2.13533	0.822722	0.71873	5.25	0.131	321	0.0163551	40.0763	0.015	2.47
Y	N	370.411	28.6346	0.146602	89.1948	4.48	1.88	4.27	3.5	2.78	48.2	31	7.03	86.4	1.85487	0.61208	0.708904	5.21	0.262	354	0.0147175	19.8855	0.015	4.38
Q	N	262.856	24.7149	0.108815	79.0198	10.0115	1.91	8.02	3.6	2.84	39.8	37.9	9.03	168	3.56295	1.52135	1.20719	8.62	0.0636	167	0.0516168	135.535	0.023	1.36
Q	N	138.949	20.4745	0.205865	78.2793	8.37059	2.13	8.49	3.4	3.06	17.2	33	11.5	107	5.38563	2.31106	1.63305	2.89	0.00599	375	0.00770667	482.471	0.009	0.14
Q	N	70.5742	26.8868	0.180188	89.0732	9.95556	2.13	7.25	3.35	3.43	26.8	84	16.4	155	3.93452	1.04009	1.39686	9.03	0.104	244	0.0370082	86.8269	0.024	2.05
Q	N	223.722	23.6974	0.173217	87.7642	7.275	2.98	7.42	3.32	3.04	19	24.2	13.8	110	3.69393	1.44676	1.28783	7.83	0.283	340	0.0230294	27.6678	0.021	4.56
Q	N	154.102	27.1436	0.128591	91.6649	8.55455	2.62	5.62	3.9	3.18	16.1	47.2	13	99.4	4.35304	1.83313	1.46084	6.93	0.0919	264	0.02625	75.4081	0.019	1.77
Z	N	145.14	23.3333	0.158548	84.6491	5.6	5.12	9.7	4.42	3.62	30.2	15.5	11.9	112	4.25752	1.89556	1.3735	5.37	0.102	300	0.0179	52.6471	0.015	2.01
Z	N	517.432	27.8502	0.20119	82.0115	9.84545	3.95	7	2.93	3.24	27.4	40.3	14	155	5.81025	2.14499	1.87143	4.12	0.0864	309	0.0133333	47.6852	0.012	1.74
Z	N	334.751	22.1074	0.091284	78.733	8.55889	2.35	8.45	5.04	2.52	47.5	53.8	14.4	145	3.20204	0.889894	1.22134	4.4	0.17	344	0.0127907	25.8824	0.013	3.06
Z	N	462.875	19.8549	0.13851	86.4895	8.675	2.58	10.91	3.68	3.02	23.6	38.1	15.2	112	4.85079	1.88565	1.51648	6.04	0.0873	274	0.0220438	69.1867	0.017	1.75
Z	N	231.707	23.6804	0.260418	81.369	5.88889	3.77	8.78	4.35	2.92	34.5	29.4	12.3	156	4.35982	2.26598	1.28978	5.07	0.0891	294	0.0172449	56.9024	0.014	1.8
II	N	431.818	25.2643	0.13194	88.865	5.04348	2.55	5.46	4.12	2.84	40.4	24.2	9.37	104	3.10579	1.20748	1.06955	8.88	0.284	334	0.0265868	31.2676	0.023	4.57
II	N	321.77	23.8695	0.118409	77.8566	4.14798	4.77	6.77	4.35	3.87	81.4	42.3	13.1	121	4.41868	1.95492	1.28988	9.93	0.18	294	0.0337755	55.1667	0.026	3.29
II	N	255.125	23.4473	0.127457	88.1685	5.31786	3.01	4.98	4.2	3.5	43.9	33.5	10.3	81.3	3.27551	1.24784	1.06333	7.36	0.145	302	0.0243709	50.7586	0.02	2.76
II	N	299.688	21.5116	0.130663	90.056	6.1375	2.86	5.41	4.15	2.72	33.5	29.4	11.6	96.9	2.30238	0.680416	0.799141	8.07	0.0874	236	0.0341949	92.3341	0.021	1.8
II	N	318.844	25.351	0.0932546	90.3572	5.34286	2.98	4.57	5.05	3.43	42.5	24.8	10	77.7	2.92181	1.23149	0.983373	7.96	0.0706	204	0.0390196	112.748	0.021	1.49
II	N	97.7163	23.6111	0.155796	89.8888	6.01538	2.3	8.19	2.75	3.12	68.9	72.8	12.5	114	3.92995	1.65975	1.20625	7.45	0.126	289	0.0257785	59.127	0.02	2.41

## Sheet: Second year
Treatment	GLD symptom expression	Proline (µg/g DW)	DW leaves (%)	Length internode (cm)	RWC(%)	Perm. Memb. (%)	c (P) g/kg	c (K2O) g/kg	c (Mg) g/kg	Ca %	c (Zn) mg/kg	c (Mn) mg/kg	c (Cu) mg/kg	c (Fe) mg/kg	Cl a (mg/gDW)	Cl b (mg/gDW)	Car (mg/gDW)	Photo (A)	Cond (gs)	Ci	A/Ci	W(A/gs)	PhiCO2	Trmmol
C	N	150.224	21.7568	7.30769	91.1335	0.117362	9.56	12.65	4.43	3.33	23.4	36.8	15.5	143	2.10332	0.246538	0.65443	6.58558	0.226208	295	0.022324	29.1129	0.019	2.29
C	N	244.996	21.6587	5.625	87.5253	0.147294	10.28	9.74	4.39	3.53	17.4	29.9	15.5	151	2.18801	0.315454	0.716296	5.60543	0.161684	296	0.0189373	34.6691	0.031	2.66
C	N	150.172	26.9485	5.8	88.6014	0.125503	5.97	7.41	3.72	2.76	19.6	20.6	11.4	115	3.63831	0.414078	0.470014	5.54515	0.077348	295	0.0187971	71.6909	0.02	2.57
X	N	99.6512	25.7051	8.25	83.7065	0.105844	2.54	4.45	2.96	3.1	22.5	21.6	17.9	158	2.38638	0.147234	0.762863	2.52597	0.0482	315	0.00801896	52.406	0.024	2.56
X	N	71.3919	22.26	5.6875	87.9003	0.101661	4.9	10.11	3.5	3.67	92.8	40.2	23.3	147	2.38172	0.711529	0.616169	2.70003	0.159356	258	0.0104652	16.9434	0.023	2.24
X	N	110.418	21.9247	6.77778	84.5859	0.104393	2.82	11.1	1.65	3.05	11.9	20.5	9.16	89.8	3.2987	0.462685	1.04893	2.6062	0.10216	238	0.0109504	25.5109	0.035	2.67
X	N	207.483	25.0082	6	90.0642	0.095279	3.42	5.26	3.93	4.14	57.7	45.4	16.9	155	1.9398	0.276097	0.634219	2.65791	0.055348	297	0.00894918	48.0217	0.024	2.2
X	N	179.839	29.5216	6.6	86.1008	0.0811376	4.41	10.2	4.17	3.77	43	28	15.6	118	2.25919	0.352449	0.642922	2.27132	0.09928	128	0.0177447	22.8779	0.018	3.27
Y	Y	133.379	34.5997	5.17647	78.1027	0.123603	3.35	6.18	2.37	2.67	26.4	28.9	13.8	104	1.88333	0.26516	0.500517	2.65983	0.106108	263	0.0101134	25.0672	0.023	2.15
Y	N	200.069	37.7258	5	89.091	0.119179	3.14	6.22	3.22	3.21	23	37.1	14.4	134	3.11711	0.2291	0.791475	2.50051	0.05746	303	0.0082525	43.5174	0.031	2.4
Y	N	92.7044	25.432	4.25	81.3001	0.0817097	1.93	7.71	2.61	2.03	28.9	21.8	14.4	98.6	2.63862	0.834527	0.521295	2.63058	0.098668	335	0.00785249	26.6609	0.024	2.18
Y	N	108.083	23.1162	7.25	86.9988	0.0783742	5.9	13.15	3.58	3.84	57	44	16.6	216	3.5861	0.180014	0.995673	2.62371	0.103432	102	0.0257226	25.3665	0.018	2.55
Y	Y	132.438	24.3488	4	89.2654	0.127451	6.28	11.48	3.93	3.48	28	29.9	12.8	133	2.08251	0.459832	0.515461	2.60512	0.264404	263	0.0099054	9.8528	0.019	2.16
Q	N	214.652	27.182	5.54167	84.7984	0.0937441	4.16	8.08	3.46	3.36	26.2	24.5	14.8	106	2.07631	0.182696	0.731985	2.49772	0.068536	220	0.0113533	36.4439	0.031	1.23
Q	N	208.676	27.7354	4.07692	83.4535	0.107914	2.19	4.86	2.83	3.2	48	30.7	13.6	98.6	2.87884	0.176481	0.884922	2.35486	0.229152	322	0.00731324	10.2764	0.023	1.3
Q	Y	204.215	29.7767	4.54545	84.8592	0.102392	3.02	5.09	2.69	3.23	43.8	31.8	12.6	69	1.26154	0.216416	0.32017	2.57606	0.058332	302	0.00852999	44.162	0.015	2.17
Q	Y	197.038	28.4159	4.78947	77.4908	0.120086	4.51	4.63	2.04	3.37	66.9	20.6	10.9	77.4	1.10934	0.128344	0.387537	2.67414	0.096744	302	0.00885478	27.6414	0.024	2.02
Q	N	74.0128	29.1001	6.36364	83.3308	0.117016	2.66	6.93	3.21	3.35	35	47.1	12.2	95	2.46177	0.831258	0.535853	2.45181	0.054392	338	0.00725388	45.0767	0.029	2.27
Z	N	191.209	31.551	4.625	86.5041	0.139087	3.43	9.55	3.92	3.96	20.3	40.7	19.2	145	3.8312	0.721264	0.913425	2.58284	0.278984	288	0.00896818	9.25801	0.025	2.36
Z	N	232.264	27.5109	3.44444	90.3906	0.13784	5.65	16.91	4.22	3.85	17.2	26.9	17.4	170	3.43091	0.228071	0.983316	2.60756	0.08874	338	0.00771466	29.3842	0.024	3.12
Z	N	98.8847	26.1783	4.55556	86.2945	0.131908	3.52	9.19	3.49	3.33	58.6	33.4	15.8	183	3.3636	0.403529	0.845123	2.71039	0.303328	279	0.00971465	8.9355	0.027	2.48
Z	N	162.442	29.5928	4.375	87.6027	0.133501	3.9	10.42	2.91	3.42	21.5	35.8	16.5	133	2.92165	0.537586	0.517133	2.67816	0.379244	312	0.00858384	7.06183	0.028	2.37
II	N	108.164	24.7135	6.8	83.0194	0.115199	2.45	7.6	4	3.11	26.4	33.1	13.6	105	2.96899	0.6534	0.714293	2.55365	0.02824	332	0.00769172	90.4268	0.028	1.39
II	N	86.6532	33.9207	5.54167	85.78	0.102856	3.53	7.48	4.18	3.77	117	50	19.2	117	2.99602	0.0319483	0.953372	2.5591	0.29362	301	0.00850198	8.71567	0.022	1.92
II	N	260.308	29.2506	4.71429	88.9122	0.0934383	4.15	6.17	4.57	3.82	38.6	45.3	13.3	84.2	1.58297	0.000991837	0.647863	2.56854	0.159896	322	0.00797683	16.0638	0.026	0.76
II	N	158.774	26.0967	6.95652	89.0331	0.123224	3.17	6.94	3.36	3.67	31.7	37.8	17.8	89.3	2.07821	0.0887456	0.704497	2.57811	0.270848	286	0.00901436	9.51865	0.036	1.17
II	N	120.821	25.3962	5.88889	85.8308	0.119029	4.45	8.84	4.34	3.52	38.6	39.2	19.6	90.1	2.55504	0.854831	0.515983	2.59856	0.08504	342	0.00759813	30.5569	0.023	2.22
II	N	125.391	28.1393	5.2235	86.3236	0.125566	4.49	7.82	2.11	3.03	59.4	39.4	12.8	58.8	2.28744	0.248332	0.781243	2.59586	0.29418	240	0.0108161	8.82404	0.025	1.2
