# Supplementary material
Source: MDPI journal article supplement (https://www.mdpi.com/2311-7524/10/5/495)
Supplement: s1 [file s1 › Supplementary table 4. - qPCR raw data.xlsx]

## Sheet: dct
Treatment	Repetition	actin	tubulin	geo mean HKG	f3h2	dct f3h2	lar2	dct lar2	npr1	dct npr1	ss3	dct ss3	sps	dct sps
C	1	23.0272	27.0696	24.9667	29.5257	-4.55897	24.7225	0.244183	28.221	-3.25429	28.3617	-3.39505	27.1165	-2.14981
C	4	21.3016	24.5618	22.8737	27.3456	-4.47189	22.9856	-0.111863	25.9287	-3.05498	25.7946	-2.92092	24.7687	-1.89496
C	5	23.6664	27.1985	25.3711	28.6651	-3.29404	23.877	1.49405	27.6586	-2.28749	29.811	-4.43986	29.2397	-3.86857
II	A	21.4115	25.3939	23.3179	25.4643	-2.1464	23.1258	0.192043	26.1804	-2.86255	25.3495	-2.03165	23.4438	-0.125988
II	C	21.5702	25.0345	23.2379	26.8936	-3.65572	22.6052	0.63268	26.0143	-2.77643	25.3068	-2.06892	24.0008	-0.76291
II	D	23.63	26.4081	24.9804	27.6939	-2.71345	24.1449	0.835499	27.3888	-2.40836	26.9069	-1.92646	26.3448	-1.36433
X	A	22.208	28.74	25.2637	29.3886	-4.12491	24.3019	0.961835	26.6619	-1.3982	26.5303	-1.26653	27.0859	-1.82213
X	B	23.5564	27.4824	25.4438	29.52	-4.0762	25.3078	0.135989	28.4496	-3.00582	28.064	-2.62018	28.0656	-2.62185
X	C	25.7194	29.7301	27.6521	32.4659	-4.81378	27.7632	-0.111084	30.2822	-2.63007	30.1476	-2.49549	29.9599	-2.30778
Y	A	27.2872	30.41	28.8063	32.7949	-3.98862	28.5556	0.250665	31.7952	-2.98893	29.3276	-0.521275	31.9148	-3.10849
Y	B	22.6392	27.0491	24.7461	28.1971	-3.45096	23.3949	1.35119	27.2816	-2.53554	26.8065	-2.06044	26.958	-2.2119
Y	C	23.1896	27.4041	25.209	30.0041	-4.79515	24.1886	1.02038	28.0262	-2.8172	27.7696	-2.56062	28.5184	-3.30949
Z	A	23.0354	27.11	24.9898	29.1229	-4.13311	24.0626	0.927153	27.1228	-2.13301	26.1284	-1.13861	28.1341	-3.14432
Z	B	22.3265	26.5336	24.3393	27.7837	-3.44437	23.2105	1.12882	26.7412	-2.40194	26.0326	-1.69328	26.3751	-2.03578
Z	C	21.2566	25.3341	23.206	28.1111	-4.90508	22.3333	0.87264	25.431	-2.225	23.8612	-0.655225	26.3457	-3.13968
Q	B	22.8729	29.567	26.0054	25.9981	0.0073476	24.1691	1.83637	28.1622	-2.15678	25.3738	0.631643	32.7389	-6.73349
Q	D	24.1965	29.057	26.5156	29.6159	-3.10033	25.0616	1.45394	28.1752	-1.65966	28.1951	-1.67956	27.8405	-1.32497
Q	E	25.1031	29.0918	27.024	29.7336	-2.70962	26.7006	0.323439	30.7157	-3.69167	29.5868	-2.56277	30.5235	-3.49955
